# Supplementary material for: Tortuosity Index Calculations in Retinal Images: Some Criticalities Arising from Commonly Used Approaches
Source: MDPI journal article supplement (doi:10.3390/info12110466), 2021-11-10
Supplement: s1 [file s1]

Archive with 1 entries (1 files):
- information-1411706-supplementary.pdf
